# Supplementary material
Source: publisher figshare collection journal article supplement (https://gsajournals.figshare.com/ndownloader/files/24740732)
Supplement: Supplementary file 1 [file 24740732]

**Table S2, Mutation rate estimates under the observed allelic bias at *de novo* mutations**

| **Predicted read freq.** | **mutation rate** | **CI lower** | **CI upper** | **Lines** |
| --- | --- | --- | --- | --- |
| 0.34 | 1.69E-10 | 8.66E-11 | 3.18E-10 | L. minor salt |
| 0.34 | 8.66E-11 | 3.47E-11 | 1.94E-10 | L. minor control |
| 0.28 | 9.91E-11 | 5.50E-11 | 1.74E-10 | S. polyrhiza salt |
| 0.28 | 8.39E-11 | 4.78E-11 | 1.44E-10 | S. polyrhiza control |
